# Supplementary material for: Augmented base pairing networks encode RNA-small molecule binding preferences
Source: PubMed Central journal article supplement — Nucleic Acids Res. 2020 Jul 11;48(14):7690–9. doi: 10.1093/nar/gkaa583 (PMC7430648; doi:10.1093/nar/gkaa583), 2020-07-11
Supplement: gkaa583_supplemental_file.pdf [file gkaa583_supplemental_file.pdf]

# AUGMENTED BASE PAIRING NETWORKS ENCODE RNA-SMALL MOLECULE BINDING PREFERENCES

CARLOS OLIVER, VINCENT MALLET, ROMAN SARRAZIN GENDRON, VLADIMIR REINHARZ, WILLIAM L. HAMILTON, NICOLAS MOITESSIER, JÉRÔME WALDISPÜHL

## S1. DATA PREPARATION

**S1.1. Binding Site extraction.** A crucial step in our learning pipeline is the construction of ABPNs from crystal structure data. Once all crystal structures are acquired, we consider spheres of varying radii around the ligand to define a binding site. We studied two parameter choices which affect the number and quality of the extracted binding sites: radius and protein vs. RNA content. As the radius increases, we obtain a larger number of binding sites. However, since the crystal structures often contain proteins, we increase the probability that the binding site will be dominated by protein residues. We therefore compute the ratio of RNA to Protein residues in the binding site. The resulting counts for binding sites are shown in **Fig. S1.1**. From this data we choose a minimum RNA concentration of 0.6 for our training model. If a PDB contains multiple binding events of the same ligand, we keep only one at random to reduce redundancies. At this stage, we have identified a set of atomic coordinates which correspond to binding sites. Since we apply a hard distance cutoff in the crystal structure, the resulting graphs often have chain discontinuities. To address this issue, we add all 1-neighbour breadth first nodes to the original graph, as well as remove any disconnected components with fewer than 4 nodes.

**S1.2. Fingerprint representation.** We use the MACCS fingerprints to represent the chemical space of small molecules. A projection of this representation as well as the space occupied by RNA ligand is depicted in **Fig. S2**

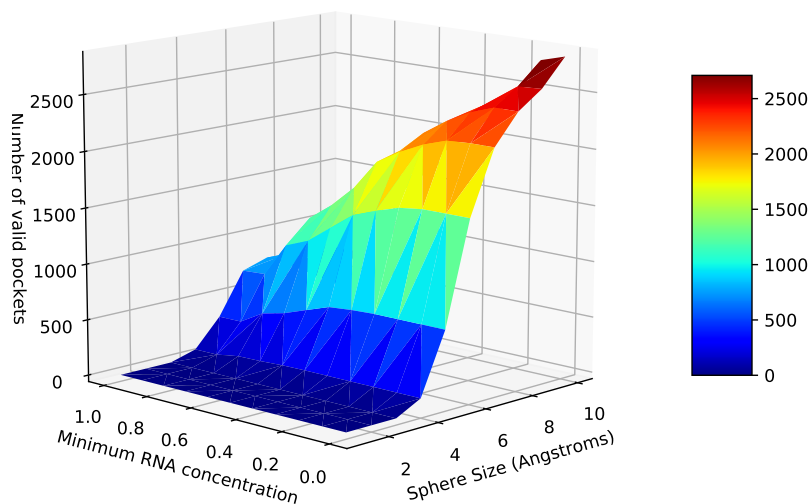

FIGURE S1. Number of binding sites retrieved versus distance threshold and RNA concentration threshold

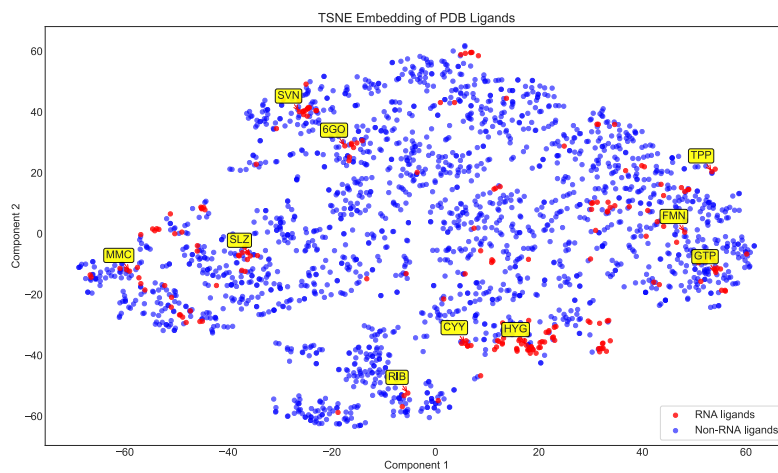

FIGURE S2. Two dimensional TSNE [1] embeddings of chemical fingerprints sampled from the PDB databank (RNA and protein binding). RNA ligands are highlighted in red and protein ligands in blue. We label a few interesting ligands such as 'KAN' and 'FMN' which correspond to well-known RNA binding classes known as aminoglycosides and riboswitch-binding amines respectively.

## S2. RGCN

We use a Relational Graph Convolutional Network (RGCN) [2] as the core of the fingerprint prediction model. An RGCN is a function that associates real vectors of size  $d$  for each node of a graph, known as node embeddings. Given initial node embeddings  $h_u^0$  for each node  $u$ , an activation function  $\sigma$  and a graph structure that induces  $\mathcal{R}$  edge-types and neighboring structure for each node  $\mathcal{N}_u^r$ , we can then use learnable matrices  $W$  that yield other node embeddings, according to the formula :

$$h_u^{l+1} = \sigma \left( W_{r_0}^l h_u^l + \sum_{r \in \mathcal{R}} \sum_{v \in \mathcal{N}_u^r} \frac{1}{c_{u,r}} W_r^l h_v^l \right)$$

Successive embeddings for each node are obtained by repeatedly using this process, until each node is attributed a final embedding  $h_L(u)$ . For this work, we consider the base pairing types to be distinct edge-types. We believe this is a fair approximation given the results of isostericity comparisons showing that computing the geometric discrepancy between of all pairs of edge types yields close to a diagonal matrix [3].

Once node embeddings are computed, we concatenate the resulting embedding matrix with a one-hot encoding of the input graph’s nucleotides (**A**, **U**, **C**, **G**). Next, graph-level representation is obtained by applying a widely used trainable Graph Attention Pooling layer [4], to map the node embeddings to a single vector  $e_f \in \mathbb{R}^d$ . Finally, we feed  $e_f$  through a Multi Layer Perceptron which yields probabilities for each index of the fingerprint  $\hat{y}$ .

$$\begin{aligned} e_f &= \text{GAT}(\text{Graph, final node embeddings}) \\ \hat{y} &= \text{MLP}(e_f) \end{aligned}$$

We supervise this process using the binary cross entropy  $\mathcal{L}_{fp}$  between the predicted fingerprint and the observed one  $y$  over all dimensions  $i$ , and train the model by minimizing this loss over the training data.

$$\mathcal{L}_{fp} = \sum_{i=0}^k [y_i \cdot \log \hat{y}_i + (1 - y_i) \cdot \log(1 - \hat{y}_i)]$$

## S3. UNSUPERVISED PRE-TRAINING

As described in the main text, we wish to define similarity functions  $K$  that take two nodes  $u$  and  $v$  and return a number close to one if they have similar neighborhoods and close to zero for dissimilar ones. In this paper we construct such a measure  $K$  from another measure  $d$ , that is a function which compares the sets of edges at a distance  $l$ , from  $u$  and  $v$ , denoted  $R_u^l, R_v^l$ . We then aggregate the results of the comparison of these sets for an increasing distance, according to the formula :

$$k_L(u, v) := N^{-1} \sum_{l=0}^{L-1} \lambda^l d(R_u^l, R_v^l)$$

The  $\lambda^l$  is a decay term which allows us to attend more to structural information close to the root nodes and we set  $\lambda = 0.5$ . We use  $N$  as a normalization constant ( $N = \frac{1-\lambda}{1-\lambda^L}$ ) to ensure the sum saturates at 1.  $d$  is defined to be a simple overlap measure on the histograms of base-pairing edge types  $f_R$ , and  $f'_R$  (i.e  $f_R(i)$  stores the number of times edge type  $i$  is observed).

$$d(R, R') := \frac{|f_R \cap f'_R|}{|f_R \cup f'_R|}$$

To compensate for the over-representation of a few edge types such as backbones and Watson-Crick edges, we scale the  $d$  value with the commonly-used Inverse-Document Frequency (IDF) factor [5]. We show in **Fig. S3** an example of a pair of nodes that obtained a high similarity score  $K$  after embeddings were computed.

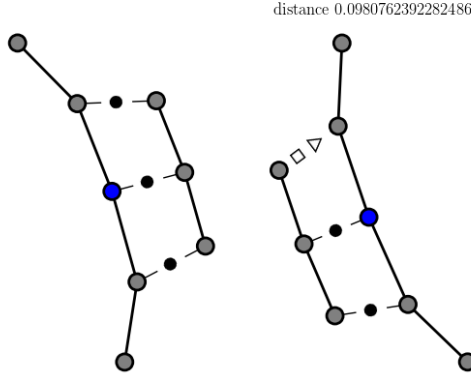

FIGURE S3. Example of pair of nodes given similar embeddings  $\phi(u), \phi(v)$ . The central pair of nodes which were used to make the comparison are colored in blue.

We then use the same RGCN function on the graph as before to annotate the nodes and get for each node, its vector embedding  $h_L(u)$  that depend on the parameters  $W$ . Finally, as in the supervised setting, we define a loss function  $\mathcal{L}_{rep}$  to minimize, that makes our network learn to approximate the dissimilarity function :

$$\mathcal{L}_{rep} = \|K(u, v) - \text{cosine}(h_L(u), h_L(v))\|_2^2$$

$$(1) \quad \text{rank}_{\mathcal{C}}(y, \hat{y}) = 1 - \frac{\rho_{y, \hat{y}, \mathcal{C}}}{|\mathcal{C}|}$$

## S4. MODEL ARCHITECTURE AND HYPERPARAMETERS

| Hyperparameter             | Value      |
|----------------------------|------------|
| RGCN Layers Dimensions     | 16, 16, 16 |
| RGCN Number of Relations   | 13         |
| RGCN Basis Sharing         | None       |
| RGCN Activation            | ReLU       |
| RGCN Dropout Probability   | 0.5        |
| GAT Layer                  | Default    |
| Fully Connected Dimensions | 16 166     |

TABLE S1. Hyperparameter choices for learning pipeline. RGCN parameters are identical for the unsupervised pre-training and the fingerprint prediction networks.

## S5. RESULTS

| Experiment    | Ranks              |          | L2                 |          |
|---------------|--------------------|----------|--------------------|----------|
|               | <i>DecoyFinder</i> | RNA      | <i>DecoyFinder</i> | RNA      |
| random        | 0.265880           | 0.276721 | 0.0384392          | 0.038299 |
| majority      | 0.320012           | 0.269375 | 0.073969           | 0.074892 |
| swap          | 0.319836           | 0.269233 | 0.071212           | 0.071308 |
| no-label      | 0.317259           | 0.272816 | 0.072830           | 0.073768 |
| primary       | 0.323843           | 0.064917 | 0.181              | 0.066853 |
| secondary     | 0.318527           | 0.299428 | 0.074738           | 0.076667 |
| ABPN          | 0.322124           | 0.301635 | 0.091479           | 0.092328 |
| ABPN + unsup. | 0.303712           | 0.294309 | 0.093006           | 0.095090 |

TABLE S2. Standard deviation on ligand screen ranks and L2 distance achieved on held-out binding sites for each condition on both decoy sets.

| method_2<br>method_1 | ABPN   | secondary | primary | no-label | majority | swap    | random  |
|----------------------|--------|-----------|---------|----------|----------|---------|---------|
| ABPN + unsup -       | 2.9-06 | 5.0e-26   | 1.4-22  | 2.0e-21  | 9.3e-25  | 7.1-26  | 2.3e-18 |
| ABPN                 | -      | 1.6e-11   | 5.6e-11 | 1.4e-08  | 4.2e-10  | 6.3e-12 | 2.0e-08 |
| secondary            |        | -         | 3.2e-01 | 7.6e-01  | 1.2e-01  | 2.8e-02 | 1.7e-01 |
| primary              |        |           | -       | 4.2e-01  | 2.7e-01  | 2.3e-02 | 3.1e-01 |
| no-label             |        |           |         | -        | 5.5e-01  | 1.5e-02 | 1.7e-01 |
| majority             |        |           |         |          | -        | 3.6e-01 | 3.3e-01 |
| swap                 |        |           |         |          |          | -       | 5.4e-01 |

TABLE S3. Pairwise Wilcoxon test for the DecoyFinder decoy set over the ligand ranks.

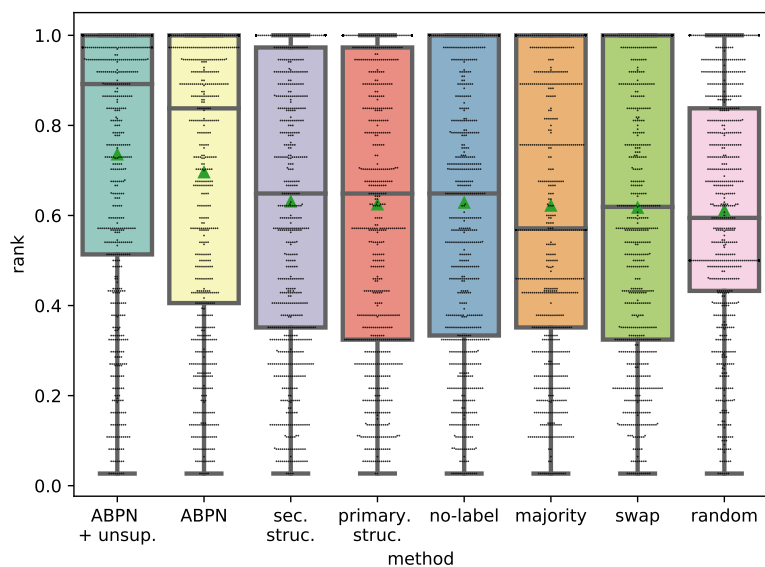

FIGURE S4. Ranks achieved by RNAmigos against the DecoyFinder screen.

Table S4: Details for each ligand in the dataset. PDB codes and full names are in the first two columns, followed by the number of occurrences. The **infor**na and **RNAmigos** columns contain the score achieved on average by each tool on the given ligand.

| Ligand | Name       | Count | Infor | na | RNAmigos |
|--------|------------|-------|-------|----|----------|
| SPD    | spermidine | 11    |       |    | 0.74     |

Continued on next page

Table S4: Details for each ligand in the dataset. PDB codes and full names are in the first two columns, followed by the number of occurrences. The **infor**na and **RNA**mi**gos** columns contain the score achieved on average by each tool on the given ligand.

| <b>Ligand</b> | <b>Name</b>                                       | <b>Count</b> | <b>Infor</b> na | <b>RNA</b> mi <b>gos</b> |
|---------------|---------------------------------------------------|--------------|-----------------|--------------------------|
| NMY           | neomycin                                          | 11           | 0.95            | 0.94                     |
| FME           | n-formylmethionine                                | 11           |                 | 0.95                     |
| SPM           | spermine                                          | 11           | 0.57            | <b>0.82</b>              |
| SAM           | s-adenosylmethionine                              | 11           | 0.60            | <b>0.82</b>              |
| PAR           | paromomycin                                       | 11           | 0.97            | <b>0.99</b>              |
| LYS           | lysine                                            | 10           | 0.75            | <b>0.91</b>              |
| GAI           | guanidine                                         | 10           | 0.24            | <b>0.65</b>              |
| FMN           | flavin                                            | 9            | <b>0.48</b>     | 0.38                     |
| VAL           | valine                                            | 9            |                 | 0.81                     |
| PRF           | 7-deaza-7-aminomethyl-guanine                     | 8            | 0.47            | <b>0.78</b>              |
| HPA           | hypoxanthine                                      | 8            | 0.28            | <b>0.94</b>              |
| 2BA           | (2r,3r,3as,5r,7ar,9r,10r,10as,12r,14ar)-2,9-bi... | 8            | 0.54            | 0.54                     |
| ADE           | adenine                                           | 8            | 0.33            | <b>0.89</b>              |
| ACY           | acetic                                            | 8            |                 | 0.88                     |
| EDO           | 1,2-ethanediol                                    | 8            |                 | 0.40                     |
| GLY           | glycine                                           | 8            |                 | 0.76                     |
| ARG           | arginine                                          | 8            | <b>0.72</b>     | 0.69                     |
| EOH           | ethanol                                           | 7            |                 | 0.60                     |
| PGE           | triethylene                                       | 7            |                 | 0.67                     |
| PPU           | puromycin-5'-monophosphate                        | 7            |                 | 0.51                     |
| GOL           | glycerol                                          | 7            | 0.69            | <b>0.88</b>              |
| PUT           | 1,4-diaminobutane                                 | 7            |                 | 0.94                     |
| C2E           | 9,9'-[(2r,3r,3as,5s,7ar,9r,10r,10as,12s,14ar)-... | 7            |                 | 0.79                     |
| GUN           | guanine                                           | 7            | 0.26            | <b>0.97</b>              |
| PEG           | di(hydroxyethyl)ether                             | 7            |                 | 0.80                     |
| GET           | geneticin                                         | 6            |                 | 0.83                     |
| SPS           | sparsomycin                                       | 6            | 0.32            | 0.34                     |
| SRY           | streptomycin                                      | 6            |                 | 0.58                     |
| TRP           | tryptophan                                        | 6            |                 | 0.88                     |
| LLL           | (2r,3r,4r,5r)-2-((1s,2s,3r,4s,6r)-4,6-diamino-... | 6            |                 | 0.70                     |
| GNG           | 2'-deoxy-guanosine                                | 5            |                 | 0.98                     |
| TPP           | thiamine                                          | 5            |                 | 0.16                     |
| GLP           | glucosamine                                       | 5            |                 | 0.70                     |

Continued on next page

Table S4: Details for each ligand in the dataset. PDB codes and full names are in the first two columns, followed by the number of occurrences. The **infor**na and **RNA**mi**gos** columns contain the score achieved on average by each tool on the given ligand.

| Ligand | Name                                               | Count | Infor       | na | RNA         | mi | gos |
|--------|----------------------------------------------------|-------|-------------|----|-------------|----|-----|
| SAH    | s-adenosyl-l-homocysteine                          | 5     | 0.73        |    | <b>0.78</b> |    |     |
| 5GP    | guanosine-5'-monophosphate                         | 5     |             |    | 0.23        |    |     |
| CLM    | chloramphenicol                                    | 5     |             |    | 0.45        |    |     |
| NH4    | ammonium                                           | 5     | 0.21        |    | 0.53        |    |     |
| MES    | 2-(n-morpholino)-ethanesulfonic                    | 5     | 0.21        |    | 0.21        |    |     |
| ACT    | acetate                                            | 5     | 0.23        |    | 0.42        |    |     |
| ERY    | erythromycin                                       | 5     |             |    | 0.42        |    |     |
| HYG    | hygromycin                                         | 5     |             |    | 0.81        |    |     |
| PRP    | alpha-phosphoribosylpyrophosphoric                 | 5     | <b>0.64</b> |    | 0.35        |    |     |
| S9L    | 2-[2-(2-hydroxyethoxy)ethoxy]ethyl                 | 4     |             |    | 0.79        |    |     |
| T1C    | tigecycline                                        | 4     |             |    | 0.37        |    |     |
| BLS    | blasticidin                                        | 4     |             |    | 0.31        |    |     |
| PRO    | proline                                            | 4     |             |    | 0.97        |    |     |
| G4P    | guanosine-5',3'-tetraphosphate                     | 4     | 0.45        |    | <b>0.76</b> |    |     |
| AMZ    | aminoimidazole                                     | 4     | <b>0.53</b> |    | 0.49        |    |     |
| SIS    | (1s,2s,3r,4s,6r)-4,6-diamino-3-[[2s,3r)-3-ami...   | 4     |             |    | 0.89        |    |     |
| 3HE    | 4-{(2r)-2-[(1s,3s,5s)-3,5-dimethyl-2-oxocycloh...  | 4     |             |    | 0.81        |    |     |
| AM2    | apramycin                                          | 3     | 0.89        |    | <b>0.95</b> |    |     |
| PO4    | phosphate                                          | 3     |             |    | 0.10        |    |     |
| TAC    | tetracycline                                       | 3     |             |    | 0.35        |    |     |
| VIR    | virginiamycin                                      | 3     |             |    | 0.48        |    |     |
| 1PE    | pentaethylene                                      | 3     |             |    | 0.92        |    |     |
| EKJ    | 4-[(3-{2-[(2-methoxyethyl)amino]-2-oxoethyl})-1... | 3     |             |    | 0.91        |    |     |
| HGR    | hygromycin                                         | 3     |             |    | 0.68        |    |     |
| ANM    | anisomycin                                         | 3     |             |    | 0.76        |    |     |
| SCM    | spectinomycin                                      | 3     |             |    | 0.76        |    |     |
| 8UZ    | tc007                                              | 3     |             |    | 0.97        |    |     |
| 6HS    | (1s,2s,3r,4s,6r)-4,6-diamino-3-[[2s,3r)-3-ami...   | 3     |             |    | 0.88        |    |     |
| XXX    | (2r,3s,4r,5r,6r)-6-((1r,2r,3s,4r,6s)-4,6-diami...  | 3     |             |    | 0.98        |    |     |
| CLY    | clindamycin                                        | 3     |             |    | 0.54        |    |     |
| NEG    | negamycin                                          | 3     |             |    | 0.70        |    |     |
| DOL    | 5-(2-diethylamino-ethanesulfonyl)-21-hydroxy-1...  | 3     |             |    | 0.04        |    |     |
| B6M    | (1r,2s,3s,4r,6r)-4,6-diamino-2-{[3-o-(2,6-diam...  | 3     |             |    | 1.00        |    |     |

Continued on next page



Table S4: Details for each ligand in the dataset. PDB codes and full names are in the first two columns, followed by the number of occurrences. The **infor**na and **RNA**mi**g**os columns contain the score achieved on average by each tool on the given ligand.

| Ligand | Name                                               | Count | Infor       | na | RNA | mi | g | os          |
|--------|----------------------------------------------------|-------|-------------|----|-----|----|---|-------------|
| ZLD    | n-[[[(5s)-3-(3-fluoro-4-morpholin-4-ylphenyl)-2... | 3     |             |    |     |    |   | 0.52        |
| IDG    | o-2,6-diamino-2,6-dideoxy-beta-l-idopyranose       | 3     |             |    |     |    |   | 0.93        |
| GLN    | glutamine                                          | 3     |             |    |     |    |   | 0.99        |
| AG2    | agmatine                                           | 2     |             |    |     |    |   | 0.70        |
| 3CO    | cobalt                                             | 2     |             |    |     |    |   | 0.25        |
| 6GU    | 6-chloroguanine                                    | 2     | 0.15        |    |     |    |   | <b>0.97</b> |
| 8OS    | 5'-o-[(s)-hydroxy(4-methyl-1h-imidazol-5-yl)ph...  | 2     | <b>0.40</b> |    |     |    |   | 0.06        |
| EGD    | n-ethylguanidine                                   | 2     | 0.37        |    |     |    |   | <b>0.64</b> |
| UAM    | amicoumacin                                        | 2     |             |    |     |    |   | 0.79        |
| RIO    | ribostamycin                                       | 2     | <b>0.96</b> |    |     |    |   | 0.99        |
| 4BW    | 2-amino-9-[(2r,3r,3as,5r,7ar,9r,10r,10as,12r,1...  | 2     |             |    |     |    |   | 0.61        |
| KSG    | (1s,2r,3s,4r,5s,6s)-2,3,4,5,6-pentahydroxycycl...  | 2     |             |    |     |    |   | 0.82        |
| SPK    | spermine                                           | 2     |             |    |     |    |   | 0.50        |
| 6AP    | 9h-purine-2,6-diamine                              | 2     | 0.27        |    |     |    |   | <b>0.82</b> |
| SE4    | selenate                                           | 2     |             |    |     |    |   | 0.06        |
| GTP    | guanosine-5'-triphosphate                          | 2     | <b>0.51</b> |    |     |    |   | 0.34        |
| ACA    | 6-aminohexanoic                                    | 2     |             |    |     |    |   | 0.98        |
| 747    | (5z)-5-[(3,5-difluoro-4-hydroxyphenyl)methylid...  | 2     |             |    |     |    |   | 0.59        |
| 6GO    | 6-o-methylguanine                                  | 2     | 0.30        |    |     |    |   | <b>0.94</b> |
| HMT    | (3beta)-o~3~-[(2r)-2,6-dihydroxy-2-(2-methoxy-...  | 2     |             |    |     |    |   | 0.19        |
| MLI    | malonate                                           | 2     |             |    |     |    |   | 0.47        |
| BDG    | o-2,6-diamino-2,6-dideoxy-alpha-d-glucopyranose    | 2     |             |    |     |    |   | 0.94        |
| CYY    | 2-deoxystreptamine                                 | 2     |             |    |     |    |   | 0.92        |
| G6P    | alpha-d-glucose-6-phosphate                        | 2     |             |    |     |    |   | 0.84        |
| PHA    | phenylalaninal                                     | 2     |             |    |     |    |   | 0.87        |
| TOC    | 2,3,6-trideoxy-2,6-diamino                         | 2     |             |    |     |    |   | 0.91        |
| PCY    | pactamycin                                         | 2     |             |    |     |    |   | 0.68        |
| SIN    | succinic                                           | 2     |             |    |     |    |   | 0.89        |
| PHE    | phenylalanine                                      | 2     |             |    |     |    |   | 0.95        |
| VIF    | flopristin                                         | 2     |             |    |     |    |   | 0.13        |
| TOA    | 3-deoxy-3-amino                                    | 2     | 0.86        |    |     |    |   | <b>0.91</b> |
| TFX    | 2-[4-(dimethylamino)phenyl]-3,6-dimethyl-1,3-b...  | 2     | 0.01        |    |     |    |   | <b>0.70</b> |
| BDR    | beta-d-ribofuranosyl                               | 2     | 0.77        |    |     |    |   | 0.77        |

Continued on next page

Table S4: Details for each ligand in the dataset. PDB codes and full names are in the first two columns, followed by the number of occurrences. The **infor**na and **RNA**minos columns contain the score achieved on average by each tool on the given ligand.

| Ligand | Name                                              | Count | Infor       | na | RNA | minos       |
|--------|---------------------------------------------------|-------|-------------|----|-----|-------------|
| 8AN    | 3'-amino-3'-deoxyadenosine                        | 2     |             |    |     | 0.23        |
| 38E    | (5z)-5-(3,5-difluoro-4-hydroxybenzylidene)-2,3... | 2     |             |    |     | 0.96        |
| TEP    | theophylline                                      | 2     | 0.08        |    |     | 0.39        |
| EUS    | n-[(1r,2s,3s,4r,5s)-5-amino-4-[(2s,3r)-3-amin...  | 2     |             |    |     | 0.71        |
| TRS    | 2-amino-2-hydroxymethyl-propane-1,3-diol          | 2     |             |    |     | 0.81        |
| CPT    | cisplatin                                         | 2     |             |    |     | 0.68        |
| EDE    | edeine                                            | 2     |             |    |     | 0.71        |
| AMP    | adenosine                                         | 2     | <b>0.61</b> |    |     | 0.33        |
| SUC    | sucrose                                           | 2     |             |    |     | 0.63        |
| 1TU    | 4-(3,5-difluoro-4-hydroxybenzyl)-1,2-dimethyl-... | 2     | 0.13        |    |     | <b>0.98</b> |
| DAI    | (3as,9as)-2-pentyl-4-hydroxymethyl-3a,4,9,9a-t... | 2     |             |    |     | 0.25        |
| LC2    | n-[(1s,2r,3e,5e,7s,9e,11e,13s,15r,19r)-7,13-di... | 2     |             |    |     | 0.82        |
| SPE    | thermine                                          | 2     |             |    |     | 0.61        |
| AB9    | (2r)-4-amino-n-[(1r,2s,3r,4r,5s)-5-amino-2-{2-... | 2     |             |    |     | 0.89        |
| TOY    | tobramycin                                        | 2     |             |    |     | 0.98        |
| MGX    | 1-methylguanidine                                 | 1     | 0.19        |    |     | <b>0.93</b> |
| 6MN    | 2-amino-2-deoxy-6-o-phosphono-alpha-d-mannopyr... | 1     |             |    |     | 0.86        |
| GE2    | 3,5-diamino-cyclohexanol                          | 1     |             |    |     | 0.98        |
| 2QB    | 5-(azidomethyl)-2-methylpyrimidin-4-amine         | 1     |             |    |     | 0.25        |
| GCP    | phosphomethylphosphonic                           | 1     |             |    |     | 0.45        |
| GE1    | 3,4-dideoxy-2,6-amino-alpha-d                     | 1     | <b>0.82</b> |    |     | 0.72        |
| IPA    | isopropyl                                         | 1     |             |    |     | 0.53        |
| NMZ    | (2s)-4-amino-n-[(1r,2s,3r,4r,5s)-5-amino-3-{[3... | 1     |             |    |     | 0.87        |
| ZZR    | 3,6-diamino-1,5-dihydro[1,2,4]triazolo[4,3-b][... | 1     |             |    |     | 0.93        |
| GMP    | guanosine                                         | 1     |             |    |     | 0.98        |
| GZ4    | 7,8-dimethyl-2,4-dioxo-10-(3-phenylpropyl)-1,2... | 1     |             |    |     | 0.79        |
| 3LK    | bc-3205                                           | 1     |             |    |     | 0.36        |
| 3TS    | (2s,3s,4r,5r,6r)-2-(aminomethyl)-5-azanyl-6-[(... | 1     |             |    |     | 0.92        |
| P12    | 4-[amino(imino)methyl]-1-[2-(3-ammoniopropoxy)... | 1     | <b>0.62</b> |    |     | 0.41        |
| ZZS    | 1,3,5-triazine-2,4-diamine                        | 1     |             |    |     | 0.94        |
| EZP    | n-[(1r,2r)-1,3-dihydroxy-1-(4-nitrophenyl)prop... | 1     |             |    |     | 0.46        |
| RPO    | (1r,2r,3s,4r,6s)-4,6-diamino-2-{[3-o-(2,6-diam... | 1     |             |    |     | 0.96        |
| GZ7    | 10-(6-carboxyhexyl)-8-(cyclopentylamino)-2,4-d... | 1     |             |    |     | 0.98        |

Continued on next page

Table S4: Details for each ligand in the dataset. PDB codes and full names are in the first two columns, followed by the number of occurrences. The **infor**na and **RNA**minos columns contain the score achieved on average by each tool on the given ligand.

| Ligand | Name                                              | Count | Infor | na | RNA | minos       |
|--------|---------------------------------------------------|-------|-------|----|-----|-------------|
| ACE    | acetyl                                            | 1     |       |    |     | 0.07        |
| RIB    | ribose                                            | 1     | 0.77  |    |     | <b>0.84</b> |
| 3K8    | (14ar)-2,3,6-trimethoxy-11,12,13,14,14a,15-hex... | 1     |       |    |     | 0.35        |
| JS5    | (2s,3s,4r,5r,6r)-5-amino-2-(aminomethyl)-6-((2... | 1     |       |    |     | 0.91        |
| SLZ    | l-thialysine                                      | 1     |       |    |     | 0.78        |
| THF    | 5-hydroxymethylene-6-hydrofolic                   | 1     |       |    |     | 0.36        |
| 51B    | 2-[(3s)-1-{2-(methylamino)pyrimidin-5-yl}meth...  | 1     |       |    |     | 0.07        |
| 218    | 1-[(4-amino-2-methylpyrimidin-5-yl)methyl]-3(...  | 1     |       |    |     | 0.45        |
| JS4    | (2s,3s,4r,5r,6r)-5-amino-2-(aminomethyl)-6-((2... | 1     |       |    |     | 0.93        |
| 62B    | lefamulin                                         | 1     |       |    |     | 0.51        |
| H4B    | 5,6,7,8-tetrahydrobiopterin                       | 1     | 0.66  |    |     | <b>0.70</b> |
| SLD    | (3z)-n-[(4e)-5-(4-{(5s)-5-[(acetylamino)methyl... | 1     |       |    |     | 0.68        |
| EZM    | n-[(1r,2r)-1,3-dihydroxy-1-(4-nitrophenyl)prop... | 1     |       |    |     | 0.44        |
| 6NO    | avilamycin                                        | 1     |       |    |     | 0.10        |
| 3J2    | nagilactone                                       | 1     |       |    |     | 0.28        |
| HEZ    | hexane-1,6-diol                                   | 1     |       |    |     | 0.98        |
| SJP    | (2r,3r)-4-amino-n-[(1r,2s,3r,4r,5s)-5-amino-4-... | 1     |       |    |     | 0.87        |
| JS6    | (1r,2r,3s,4r,6s)-4,6-diamino-2-{[3-o-(2,6-diam... | 1     |       |    |     | 0.92        |
| 3L2    | (4s,5r,10e,12z,16r,16as,17s,18r,19ar,23ar)-4-h... | 1     |       |    |     | 0.11        |
| ISH    | (7r)-7-[(dimethylamino)methyl]-1-[3-(dimethyla... | 1     | 0.16  |    |     | 0.22        |
| P14    | n-[2-(2-{[(4-{[amino(imino)methyl]amino}butyl)... | 1     | 0.69  |    |     | 0.66        |
| G34    | (3as,4r,5s,6s,8r,9r,9ar,10r)-5-hydroxy-4,6,9,1... | 1     |       |    |     | 0.17        |
| P13    | n-[2-(3-aminopropoxy)-5-(1h-indol-5-yl)benzyl]... | 1     | 0.55  |    |     | <b>0.61</b> |
| KAN    | kanamycin                                         | 1     |       |    |     | 1.00        |
| 7DG    | 7-deazaguanine                                    | 1     | 0.24  |    |     | 0.27        |
| ON0    | (1r,2r,3s,4r,6s)-4,6-diamino-2-{[3-o-(2,6-diam... | 1     |       |    |     | 0.97        |
| AB6    | (2r)-4-amino-n-((1r,2s,3r,4r,5s)-5-amino-4-[(2... | 1     |       |    |     | 0.89        |
| GZG    | 4-{benzyl[2-(7,8-dimethyl-2,4-dioxo-3,4-dihydr... | 1     |       |    |     | 0.53        |
| G80    | (3as,4r,5s,6s,8r,9r,9ar,10r)-5-hydroxy-4,6,9,1... | 1     |       |    |     | 0.50        |
| T8B    | thermorubin                                       | 1     |       |    |     | 0.66        |
| 2TB    | 1,3-diamino-4,5,6-trihydroxy-cyclohexane          | 1     |       |    |     | 0.89        |
| 3AW    | 6-methyl-1,3,5-triazine-2,4-diamine               | 1     |       |    |     | 0.95        |
| 2BP    | 9h-purin-2-amine                                  | 1     | 0.27  |    |     | <b>1.00</b> |

Continued on next page

Table S4: Details for each ligand in the dataset. PDB codes and full names are in the first two columns, followed by the number of occurrences. The **infor**na and **RNA**igos columns contain the score achieved on average by each tool on the given ligand.

| Ligand | Name                                               | Count | Infor       | na | RNA | igos        |
|--------|----------------------------------------------------|-------|-------------|----|-----|-------------|
| EZG    | n-[(1r,2r)-1,3-dihydroxy-1-(4-nitrophenyl)prop...  | 1     |             |    |     | 0.50        |
| ARF    | formamide                                          | 1     |             |    |     | 0.32        |
| 5CR    | n-acetyl-l-phenylalanine                           | 1     |             |    |     | 0.99        |
| 3KF    | (2s,3r,4s,4ar)-2,3,4,7-tetrahydroxy-3,4,4a,5-t...  | 1     |             |    |     | 0.50        |
| ZBA    | 12,13-epoxytrichothec-9-ene-3,4,8,15-tetrol-4,...  | 1     |             |    |     | 0.24        |
| N6M    | n-methyl-9h-purin-6-amine                          | 1     | 0.23        |    |     | <b>0.99</b> |
| 4M2    | 3'-deoxy-3'-{[(2e)-3-(4-{[(4z)-6-o-(6-deoxy-3,...  | 1     |             |    |     | 0.23        |
| N30    | (1r,2r,3s,4r,6s)-4,6-diamino-2-[(5-amino-5-deo...  | 1     |             |    |     | 0.99        |
| 2QC    | 1-[4-(1,2,3-thiadiazol-4-yl)phenyl]methanamine     | 1     | 0.35        |    |     | 0.44        |
| 2HP    | dihydrogenphosphate                                | 1     |             |    |     | 0.65        |
| 0EC    | 6,7-dimethoxy-2-(piperazin-1-yl)quinazolin-4-a...  | 1     | 0.43        |    |     | 0.31        |
| RBF    | riboflavin                                         | 1     |             |    |     | 0.96        |
| EKM    | 1-methyl-4-[(1e)-3-(3-methyl-1,3-benzothiazol-...  | 1     |             |    |     | 0.88        |
| MMC    | methyl                                             | 1     |             |    |     | 0.18        |
| EVN    | (2r,3r,4r,6s)-6-{[(2r,3ar,4r,4'r,5's,6s,6'r,7s...  | 1     |             |    |     | 0.03        |
| SFG    | sinefungin                                         | 1     | 0.73        |    |     | <b>0.99</b> |
| EEM    | [(3s)-3-amino-4-hydroxy-4-oxo-butyl]-[[[(2s,3s,... | 1     |             |    |     | 0.23        |
| CIR    | citrulline                                         | 1     |             |    |     | 0.70        |
| AKN    | (2s)-n-[(1r,2s,3s,4r,5s)-4-[(2r,3r,4s,5s,6r)-6...  | 1     |             |    |     | 0.95        |
| 34G    | emetine                                            | 1     |             |    |     | 0.53        |
| MT9    | (3r,4s,5s,7r,9e,11s,12r)-12-ethyl-11-hydroxy-3...  | 1     |             |    |     | 0.91        |
| RAP    | rapamycin                                          | 1     | 0.50        |    |     | <b>0.66</b> |
| S81    | (1r,2r,3s,4r,6s)-4,6-diamino-2,3-dihydroxycycl...  | 1     |             |    |     | 0.94        |
| ATP    | adenosine-5'-triphosphate                          | 1     |             |    |     | 0.08        |
| GND    | 2-amino-5-guanidino-pentanoic                      | 1     |             |    |     | 0.95        |
| PRL    | proflavin                                          | 1     |             |    |     | 0.56        |
| G0B    | (1s,2r,3s,4r,6s)-4,6-bis-{[amino(iminio)methyl]... | 1     | <b>0.94</b> |    |     | 0.90        |
| PMZ    | 1-[10-(3-dimethylamino-propyl)-10h-phenothiazi...  | 1     | 0.03        |    |     | 0.05        |
| TPS    | thiamin                                            | 1     |             |    |     | 0.11        |
| PDI    | phosphoric                                         | 1     |             |    |     | 0.60        |
| A2F    | 2-fluoroadenine                                    | 1     | 0.17        |    |     | <b>0.94</b> |
| CNY    | 13,15-diamino-2-(aminomethyl)-3,4,9,12-tetrahy...  | 1     |             |    |     | 0.95        |
| LEU    | leucine                                            | 1     |             |    |     | 0.97        |

Continued on next page

Table S4: Details for each ligand in the dataset. PDB codes and full names are in the first two columns, followed by the number of occurrences. The **inforna** and **RNAmigos** columns contain the score achieved on average by each tool on the given ligand.

| Ligand | Name                                                                                    | Count | Inforna     | RNAmigos    |
|--------|-----------------------------------------------------------------------------------------|-------|-------------|-------------|
| 3QB    | lincomycin                                                                              | 1     |             | 0.71        |
| 7AL    | chlorolissoclimide                                                                      | 1     |             | 0.33        |
| 29G    | pyrimido[4,5-d]pyrimidine-2,4-diamine                                                   | 1     | 0.33        | <b>0.96</b> |
| D2X    | 3-[(4-hydroxy-2-methylpyrimidin-5-yl)methyl]-5...                                       | 1     |             | 0.36        |
| HN8    | haemanthamine                                                                           | 1     |             | 0.65        |
| 95H    | $\sim\{n\}-[(1\sim\{r\},2\sim\{r\})-1-[(2\sim\{r\},3\sim\{r\},4\sim\{s\},5\sim\{r\}...$ | 1     |             | 0.26        |
| MYC    | 3,5,7-trihydroxy-2-(3,4,5-trihydroxyphenyl)-4h...                                       | 1     |             | 0.53        |
| AU3    | gold                                                                                    | 1     |             | 0.21        |
| DKM    | 5-[(3s,4s)-3-(dimethylamino)-4-hydroxypyrrolid...                                       | 1     |             | 0.74        |
| D2C    | (2s,4s,4ar,5as,6s,11r,11as,12r,12ar)-7-chloro-...                                       | 1     |             | 0.37        |
| 6UQ    | (2r,3s,4r,6s)-4-hydroxy-6-{\{(2r,3ar,4r,4'r,5's...                                      | 1     |             | 0.09        |
| 3KD    | (1s,2s,12bs,12cs)-2,4,5,7,12b,12c-hexahydro-1h...                                       | 1     |             | 0.36        |
| B1Z    | adenosylcobalamin                                                                       | 1     |             | 0.11        |
| OLZ    | o-(2-aminoethyl)-l-serine                                                               | 1     |             | 0.81        |
| ISI    | (7s)-7-[(dimethylamino)methyl]-1-[3-(dimethyla...                                       | 1     | 0.16        | 0.18        |
| AGU    | aminoguanidine                                                                          | 1     | 0.25        | 0.82        |
| FFO    | n-[4-{\{(6s)-2-amino-5-formyl-4-oxo-3,4,5,6,7,...                                       | 1     | <b>0.66</b> | 0.30        |
| HRG    | l-homoarginine                                                                          | 1     |             | 0.72        |
| 3J6    | (3beta,7alpha)-3,7,15-trihydroxy-12,13-epoxytr...                                       | 1     |             | 0.41        |
| CTC    | 7-chlorotetracycline                                                                    | 1     |             | 0.48        |
| DX4    | 2-amino-1,9-dihydro-6h-purine-6-thione                                                  | 1     |             | 0.94        |
| L94    | n'-{\(z)-amino[4-(amino{\[3-(dimethylammonio)pro...                                     | 1     | 0.30        | 0.27        |
| NME    | methylamine                                                                             | 1     |             | 0.88        |
| PA1    | 2-amino-2-deoxy-alpha-d-glucopyranose                                                   | 1     | 0.85        | 0.72        |
| B12    | cobalamin                                                                               | 1     |             | 0.01        |
| L8H    | 4-methoxynaphthalen-2-amine                                                             | 1     |             | 0.47        |
| BFT    | s-benzoylthiamine                                                                       | 1     |             | 0.26        |
| ROS    | n,n'-tetramethyl-rosamine                                                               | 1     |             | 0.30        |
| MIX    | 1,4-dihydroxy-5,8-bis(\{2-[(2-hydroxyethyl)amin...                                      | 1     | 0.73        | 0.78        |
| NEB    | 2-deoxy-d-streptamine                                                                   | 1     |             | 0.81        |
| M5Z    | (1r,2r,3s,4r,6s)-4,6-diamino-2-{\[3-o-(2,6-diam...                                      | 1     |             | 0.94        |
| PQ0    | 2-amino-4-oxo-4,7-dihydro-3h-pyrrolo[2,3-d]pyr...                                       | 1     | 0.22        | 0.94        |
| TOB    | 1,3-diamino-5,6-dihydrocyclohexane                                                      | 1     |             | 0.84        |

Continued on next page

Table S4: Details for each ligand in the dataset. PDB codes and full names are in the first two columns, followed by the number of occurrences. The **inforna** and **RNAmigos** columns contain the score achieved on average by each tool on the given ligand.

| Ligand | Name                                              | Count | Inforna | RNAmigos    |
|--------|---------------------------------------------------|-------|---------|-------------|
| V71    | (1r,2r,3s,4r,6s)-4,6-diamino-2,3-dihydroxycycl... | 1     |         | 0.94        |
| 3AY    | pyrimidine-2,4,6-triamine                         | 1     |         | 0.98        |
| 6O1    | evernimicin                                       | 1     |         | 0.03        |
| SVN    | thieno[2,3-b]pyrazin-7-amine                      | 1     | 0.15    | 0.94        |
| 29H    | 2-aminopyrimido[4,5-d]pyrimidin-4(3h)-one         | 1     | 0.27    | 0.98        |
| 6YG    | 2-[(3~{s})-1-(2-methoxypyrimidin-5-yl)methyl]...  | 1     |         | 0.59        |
| GE3    | 5-methyl-4-methylamino-tetrahydro-pyran-2,3,5-... | 1     |         | 0.73        |
| MGR    | malachite                                         | 1     | 0.05    | 0.34        |
| IEL    | n~6~-(1z)-ethanimidoyl-l-lysine                   | 1     |         | 0.67        |
| VIB    | 3-(4-amino-2-methyl-pyrimidin-5-ylmethyl)-5-(2... | 1     | 0.30    | <b>0.87</b> |
| BME    | beta-mercaptoethanol                              | 1     |         | 0.72        |
| N33    | (2s,3r,4r,5s,6r)-3-amino-4-({[(2s,3r,4r,5s,6r)... | 1     |         | 0.99        |
| ZIT    | azithromycin                                      | 1     |         | 0.37        |
| DGP    | 2'-deoxyguanosine-5'-monophosphate                | 1     |         | 0.94        |
| 3V6    | bactobolin                                        | 1     |         | 0.49        |
| IR3    | iridium                                           | 1     |         | 0.20        |
| EMK    | (2r,3s,4r,5r,8r,10r,11r,12s,13s,14r)-2-ethyl-3... | 1     |         | 0.04        |
| G19    | (2s,3ar,4r,5s,6s,8r,9r,9ar,10r)-2,5-dihydroxy-... | 1     |         | 0.17        |
| MUL    | tiamulin                                          | 1     |         | 0.15        |
| 3H3    | 4-{(2r,5s,6e)-2-hydroxy-5-methyl-7-[(2r,3s,4e,... | 1     |         | 0.63        |
| 7MB    | agelastatin                                       | 1     |         | 0.97        |
| 917    | n-({(5s)-2-oxo-3-[4-(1,3-thiazol-5-yl)phenyl]-... | 1     |         | 0.36        |
| RS3    | 1-deoxy-1-[8-(dimethylamino)-7-methyl-2,4-diox... | 1     |         | 0.96        |

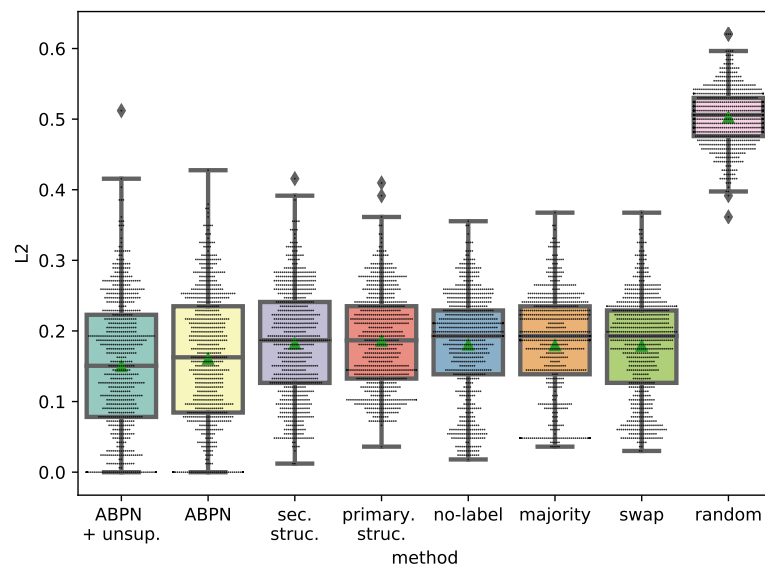

FIGURE S5. L2 distance from the native ligand achieved with RNAmigos.

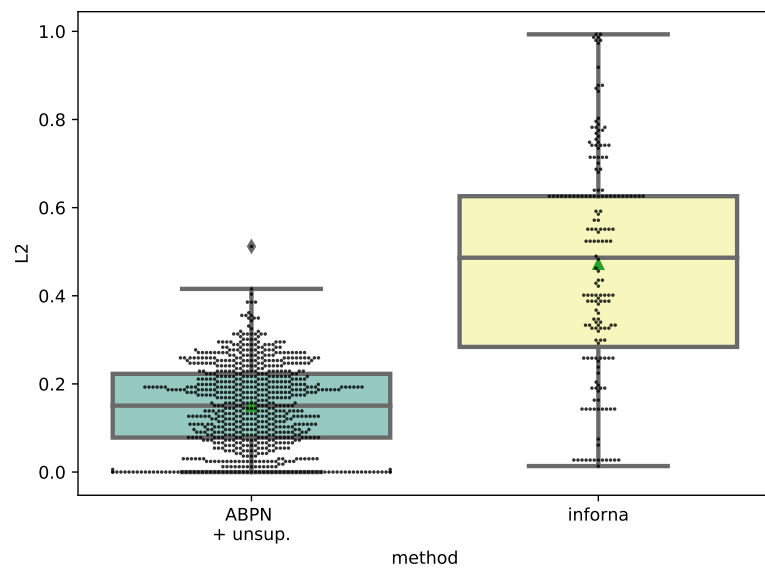

FIGURE S6. L2 distance from the native ligand achieved with Inforna

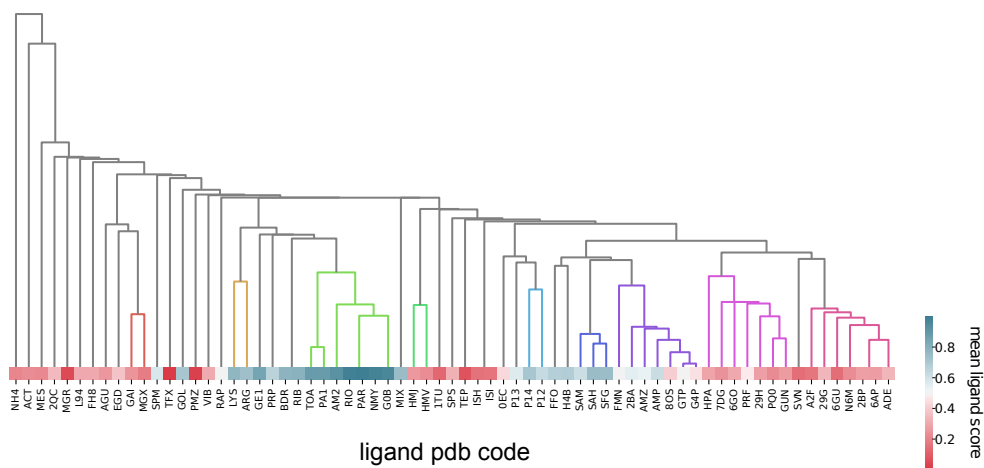

FIGURE S7. Performance per ligand type with Inforna software. A dendrogram is drawn to illustrate families of similar ligands.



## REFERENCES

- [1] Laurens van der Maaten and Geoffrey Hinton. Visualizing data using t-sne. *Journal of machine learning research*, 9(Nov):2579–2605, 2008.
- [2] Michael Schlichtkrull, Thomas N Kipf, Peter Bloem, Rianne Van Den Berg, Ivan Titov, and Max Welling. Modeling relational data with graph convolutional networks. In *European Semantic Web Conference*, pages 593–607. Springer, 2018.
- [3] Jesse Stombaugh, Craig L Zirbel, Eric Westhof, and Neocles B Leontis. Frequency and isostericity of rna base pairs. *Nucleic acids research*, 37(7):2294–2312, 2009.
- [4] Petar Veličković, Guillem Cucurull, Arantxa Casanova, Adriana Romero, Pietro Lio, and Yoshua Bengio. Graph attention networks. *arXiv preprint arXiv:1710.10903*, 2017.
- [5] Juan Ramos et al. Using tf-idf to determine word relevance in document queries. In *Proceedings of the first instructional conference on machine learning*, volume 242, pages 133–142. Piscataway, NJ, 2003.
